# Supplementary material for: Proteomic Analysis of the Secretome of Cellulomonas fimi ATCC 484 and Cellulomonas flavigena ATCC 482
Source: PLoS One. 2016 Mar 7;11(3):e0151186. doi: 10.1371/journal.pone.0151186 (PMC4780727; doi:10.1371/journal.pone.0151186)
Supplement: S2 Table — All of the data used to generate protein information figures is in the spreadsheet. The sheets contain data for the individual figures shown in the paper and in the supplemental material. (XLSX) [file pone.0151186.s004.xlsx]

## Sheet: C fimi CAZyme summary data
Locus	CAZyme	CFi protein	Present CMC	Present Xylan	No Leader	Unique in Cfi	New
Celf_0574	GH10	Xyn10C XylC
Celf_1925	GH6	Cel6B CbhA
Celf_3184	GH6	Cel6A CenA
Celf_0088	GH10	Xyn10B Cfx
Celf_0583	GH3						Y
Celf_3275	GH3						Y
Celf_1271	GH10	Xyn10A Cex
Celf_0270	AA10	CBM33
Celf_1924	GH5	Cel5A CenD
Celf_1230	GH6	Cel6C				Y	Y
Celf_2761	GH13				N
Celf_2377	Man Lectin						Y
Celf_3113	GH16						Y
Celf_3330	GH64						Y
Celf_3161	GH18
Celf_3393	GT51				N
Celf_1126	GH13-GH13
Celf_3321	GH51
Celf_3785	GT51
Celf_3545	GH81
Celf_2403	GH5					Y	Y
Celf_0403	CBM2
Celf_2168	GH23
Celf_1537	GH9	Cel9B
Celf_0019	GH9	Cel9A
Celf_0862	GH26	Man26A
Celf_3400	GH48	Cel48A
Celf_0317	GH94	Cellobiose phosphorylase			N
Celf_2168	GH23				N
Celf_0618	GT20
Celf_2726	GH3	Xyl3A			N		Y
Celf_3156	GH10	Xyn10B like					Y
Celf_0374	GH11	Xyn11A
Celf_1746	GH51
Celf_3155	GH62
Celf_1744	GH39				N
Celf_3157	GH43
Celf_2053	GH3				N

## Sheet: C flav CAZyme summary data
Locus	CAZyme	CFi homolog	Present CMC	Present Xylan	No Leader	Unique in CFl
Cfla_0172	AA10	CBM33
Cfla_1313	PL3
Cfla_2913	GH6	Cel6A like
Cfla_1896	GH6	Cel6B like
Cfla_0905	GH10	Xyn10C like				Y
Cfla_2487	GH10-GH10	Xyn10B like				Y
Cfla_2848	GH62
Cfla_2912	GH6	Cel6A like
Cfla_3558	GH10-GH10	Xyn10B like
Cfla_0246	GH11	Xyn11A like
Cfla_3024	GH10	Xyn10A like
Cfla_0242	CE1
Cfla_2024	GH10	Xyn10A like				Y
Cfla_3169	CE-CBM2
Cfla_0175	AA10	CBM33
Cfla_3563	GH9	Cel9A like				Y
Cfla_0383	CE-CBM13
Cfla_0376	GH10	Xyn10B like
Cfla_0490	AA10	CBM33
Cfla_2327	GH10	Xyn10B like
Cfla_0245	GH11-GH10
Cfla_1515	GH9	Cel9B like
Cfla_0244	GH11	Xyn11A like
Cfla_0639	GH10	Xyn10C like
Cfla_3193	GH26
Cfla_3350	GH92
Cfla_0456	GH27
Cfla_3405	GH68
Cfla_3120	CBM2					Y
Cfla_3105	GH48	Cel48A like
Cfla_1897	GH5	Cel5A like
Cfla_0316	AA10	CBM33
Cfla_1572	CBM2
Cfla_2811	GH5	Cel5A like
Cfla_0455	GH43					Y
Cfla_0016	GH9	Cel9A like
Cfla_0338	CBM2
Cfla_1332	GH81
Cfla_0179	GH43
Cfla_2521	GH13-GH13
Cfla_2117	GH105					Y
Cfla_2048	GH10					Y
Cfla_0539	GT35
Cfla_0638	CE4-GH10	Xyn10C like
Cfla_0820	GH39				N
Cfla_1018	GDP-Man synth
Cfla_1280	GH43
Cfla_2327	GH10	Xyn10B like
Cfla_3528	GH51
Cfla_2365	GT2-GT4				N
Cfla_0926	CE7
Cfla_2997	GH39				N
Cfla_3031	GH9					Y

## Sheet: C flav non-CAZymes summary
Locus	Annotation	Present CMC	Present Xylan	No Leader	Unique in CFl	CFi equivalent found
Cfla_3026	Protease				Y
Cfla_2899	Protease
Cfla_0593	Protease
Cfla_1257	Protease				Y
Cfla_1256	Protease			N
Cfla_0141	Protease					Celf_0132
Cfla_2098	Protease			N
Cfla_1374	Protease			N
Cfla_2671	Protease			N	Y
Cfla_1261	Protease
Cfla_0145	Protease			N
Cfla_0981	ESBP-5
Cfla_2399	ESBP-1					Celf_1290
Cfla_1126	ESBP-1					Celf_2729
Cfla_1550	ESBP-3					Celf_1573
Cfla_2806	ESBP-1
Cfla_2174	ESBP-1					Celf_2314
Cfla_1496	ESBP-1
Cfla_3182	ESBP-1				Y
Cfla_2998	ESBP-1
Cfla_1965	ESBP-5					Celf_1843
Cfla_2520	PBP					Celf_2609
Cfla_3041	PBP
Cfla_3696	PgBP				Y
Cfla_1976	ELBR			N
Cfla_2139	NLP/P60				Y
Cfla_3504	putative LamG domain
Cfla_2379	Pg-amidase				Y
Cfla_0700	Urea binding PBP			N
Cfla_3609	Hyp				Y
Cfla_0775	Hyp			N
Cfla_0405	Hyp				Y
Cfla_2870	Hyp
Cfla_0057	Hyp			N
Cfla_2028	Hyp				Y
Cfla_2726	Hyp			N		Celf_0921
Cfla_3694	Hyp
Cfla_1958	Hyp			N
Cfla_0411	Hyp
Cfla_0692	Hyp
Cfla_2027	Hyp			N	Y
Cfla_2753	L-Ara isomerase			N		Celf_0872
Cfla_0645	Xyl isomerase			N		Celf_0580
Cfla_1631	Nucleotidase			N		Celf_1653
Cfla_3428	Repeat protein
Cfla_3570	SOD				Y
Cfla_2198	FN3 domain repeat					Celf_2339

## Sheet: C fimi non-CAZymes summary
Locus	Annotation	Present CMC	Present Xylan	No Leader	Unique in Cfi	CFl equivalent found
Celf_1402	Protease			N
Celf_0539	Protease					Cfla_0593
Celf_1127	Protease					Cfla_2899
Celf_1431	Protease			N
Celf_2198	Protease			N
Celf_2602	Protease
Celf_0929	Protease			N
Celf_0542	Protease
Celf_2648	Protease			N
Celf_0132	Protease					Cfla_0141
Celf_0664	Flagellin				Y
Celf_1290	ESBP-1					Cfla_2399
Celf_2906	ESBP-5					Cfla_0981
Celf_1573	ESBP-3					Cfla_1550
Celf_2314	ESBP-1					Cfla_2174
Celf_1843	ESBP-5					Cfla_1965*
Celf_2729	ESBP-1					Cfla_1126
Celf_3325	ESBP-1				Y
Celf_0796	ESBP-1				Y
Celf_0469	ESBP-5				Y
Celf_0084	ESBP-1
Celf_1748	ESBP-1				Y
Celf_1830	ELBP					Cfla_1976*
Celf_3491	PBP
Celf_0887	PBP					Cfla_3041
Celf_1453	PBP
Celf_3669	PBP				Y
Celf_2609	PBP					Cfla_2520
Celf_2865	Lipoprotein					Cfla_1020
Celf_0553	NLP/P60
Celf_2060	NLP/P60			N
Celf_0738	NLP/P60
Celf_3522	Surface receptor				Y
Celf_3445	HAF-repeat
Celf_3353	Hyp
Celf_3047	Hyp
Celf_0921	Hyp					Cfla_2726
Celf_2681	Hyp
Celf_1164	Hyp				Y
Celf_2684	Hyp
Celf_1421	Hyp				Y
Celf_0123	Hyp
Celf_3560	Hyp
Celf_1285	Hyp
Celf_0738	Hyp
Celf_3654	Hyp				Y
Celf_1994	Hyp
Celf_1998	Hyp
Celf_1653	Nucleotidase					Cfla_1631
Celf_0768	alpha/beta Hydrolase			N	Y
Celf_0205	Stress			N	Y
Celf_0580	Xylose isomerase			N		Cfla_0645
Celf_2339	FN3 repeat protein					Cfla_2198
Celf_3520	Tm-channel
Celf_0636	GroEL			N
Celf_1429	Trigger factor			N
Celf_3240	Sulfate transport			N
Celf_0579	Xylulokinase			N		Cfla_0644*
Celf_0872	L-Ara isomerase			N		Cfla_2753

## Sheet: Total CAzyme comparsion
CFi locus	CAZyme description	CFl locus	CAZyme description
Celf_0574	GH10 Xyn10C XylC	Cfla_0172	CBM33 (AA9)
Celf_1925	GH6 Cel6B CbhA	Cfla_1313	PL3
Celf_3184	GH6 Cel6A CenA	Cfla_2913	GH6 Cel6A like
Celf_0088	GH10 Xyn10B Cfx	Cfla_1896	GH6 Cel6B like
Celf_0583	GH3	Cfla_0905	GH10 Xyn10C like
Celf_3275	GH3	Cfla_2487	GH10-GH10 Xyn10B like
Celf_1271	GH10 Xyn10A Cex	Cfla_2848	GH62
Celf_0270	CBM33 (AA9)	Cfla_2912	GH6 Cel6A like
Celf_1924	GH5 Cel5A CenD	Cfla_3558	GH10-GH10 Xyn10B like
Celf_1230	GH6 Cel6C U	Cfla_0246	GH11 Xyn11A like
Celf_2761	GH13	Cfla_3024	GH10 Xyn10A like
Celf_2377	Man Lectin	Cfla_0242	CE1
Celf_3113	GH16	Cfla_2024	GH10 Xyn10A like
Celf_3330	GH64	Cfla_3169	CE-CBM2
Celf_0317	GH94 Cellobiose phosphorylase	Cfla_0175	CBM33 (AA9)
Celf_3161	GH18	Cfla_3563	GH9 Cel9A like
Celf_3393	GT51	Cfla_0383	CE-CBM13
Celf_1126	GH13-GH13	Cfla_0376	GH10 Xyn10B like
Celf_3321	GH51	Cfla_0490	CBM33 (AA9)
Celf_3785	GT51	Cfla_2327	GH10 Xyn10B like
Celf_3545	GH81	Cfla_0245	GH11-GH10
Celf_2403	GH5 U	Cfla_1515	GH9 Cel9B like
Celf_0403	CBM2	Cfla_0244	GH11 Xyn11A like
Celf_2168	GH23	Cfla_0639	GH10 Xyn10C like
Celf_1537	GH9 Cel9B	Cfla_3193	GH26
Celf_0019	GH9 Cel9A	Cfla_3350	GH92
Celf_0862	GH26 Man26A	Cfla_0456	GH27 (CBM13)
Celf_3400	GH48 Cel48A	Cfla_3405	GH68
		Cfla_3120	CBM2
Celf_2168	GH23	Cfla_3105	GH48 Cel48A like
Celf_0618	GT20	Cfla_1897	GH5 Cel5A like
Celf_2726	GH3 Xyl3A	Cfla_0316	CBM33 (AA9)
Celf_3156	GH10 Xyn10B like	Cfla_1572	CBM2
Celf_0374	GH11 Xyn11A	Cfla_2811	GH5 Cel5A like
Celf_1746	GH51	Cfla_0455	GH43
Celf_3155	GH62	Cfla_0016	GH9 Cel9A like
Celf_1744	GH39	Cfla_0338	CBM2
Celf_3157	GH43	Cfla_1332	GH81
Celf_2053	GH3	Cfla_0179	GH43
		Cfla_2521	GH13-GH13
		Cfla_2117	GH105
		Cfla_2048	GH10 U
		Cfla_0539	GT35
		Cfla_0638	CE4-GH10 Xyn10C like
		Cfla_0820	GH39
		Cfla_1018	GDP-Man synth
		Cfla_1280	GH43
		Cfla_2327	GH10 Xyn10B like
		Cfla_3528	GH51
		Cfla_2365	GT2-GT4
		Cfla_0926	CE7
		Cfla_2997	GH39
		Cfla_3031	GH9 U

## Sheet: Protein totals
Protein	Cfi	CFl
CAZyme	38	52
Protease	10	11
Periplasmic/Extracellular	24	20
Hypothetical	14	12
Other	9	4
